# Supplementary material
Source: MDPI journal article supplement (https://www.mdpi.com/2311-553X/8/5/67)
Supplement: s1 [file s1]

**Supplementary Table S1.** miR-185 expression in oral cancers.

| Cancer type                            | miR-185 expression | Affected gene / pathway                       | Functional consequences                                                                                                                                                                                | Samples analyzed                                                                                       | Ref. |
|----------------------------------------|--------------------|-----------------------------------------------|--------------------------------------------------------------------------------------------------------------------------------------------------------------------------------------------------------|--------------------------------------------------------------------------------------------------------|------|
| OPMDs                                  | Down               | Akt/NF-κB pathway, Akt/CASP-9 pathway         | Decreased inflammation, apoptosis, cell proliferation, and angiogenesis                                                                                                                                | - Cell line Cal27<br>- Animal tissue                                                                   | [21] |
| OSCC                                   | Down               | <i>AQP3</i> , <i>CASP-14</i> , <i>ALOX12B</i> | Increased sensitivity to cisplatin                                                                                                                                                                     | - Cell lines SCC-11, SCC-11M, SCC-25, and SCC-25CP                                                     | [24] |
| OSCC                                   | Down               | <i>CCND2</i>                                  | Decreased <i>CCND2</i> expression and cell viability                                                                                                                                                   | - Tissue (n=58)<br>- Cell lines SCC4, SCC9, SCC1, SCC25, TU183, HSU3, FADU, OEC-M1, SNU1041, and SCC15 | [30] |
| OSCC                                   | Down               | <i>RAB14</i>                                  | Reduced <i>Rab14</i> expression and invasion, increased apoptosis                                                                                                                                      | - Tissue (n=60)<br>- Cell lines Tca-8113, SCC15, Cal-27, HSC-3, and SCC-090                            | [32] |
| OSCC                                   | Down               | <i>YWHAZ</i>                                  | Upregulation decreases <i>YWHAZ</i> and tumorigenesis                                                                                                                                                  | - Tissue (n=30)<br>- Cell lines SCC9, SCC25, CAL27, and SCC15                                          | [28] |
| OSCC                                   | Down               | <i>ZNF703</i>                                 | Promotion of proliferation and migration                                                                                                                                                               | - Tissue (n=23)<br>- Cell lines Fadu, SCC-25, CAL-27, OMEC, and Tca8113                                | [31] |
| Hypopharyngeal squamous cell carcinoma | Down               | Wnt2b/β-catenin/c-Myc pathway                 | Increased proliferation, metastasis and EMT                                                                                                                                                            | - Cell lines Fadu, TU686, TU212, and Detroit562<br>- Animal tissue                                     | [27] |
| TSCC/BOTSCC                            | -                  | -                                             | Differentiation of HPV <sup>+</sup> and HPV <sup>-</sup> TSCC/BOTSCC, low expression related to increased survival in all patients, associated with decreased survival in HPV <sup>-</sup> TSCC/BOTSCC | - Tissue (n=168)                                                                                       | [22] |

OPMD, oral potentially malignant disorder; OSCC, oral squamous cell carcinoma; TSCC, tonsillar squamous cell carcinoma; BOTSCC, base of tongue squamous cell carcinoma

**Supplementary Table S2.** miR-185 expression in nasopharyngeal cancers.

| miR-185 expression | Affected gene / pathway                 | Functional consequences                                                                                                                   | Samples analyzed                                                   | Ref. |
|--------------------|-----------------------------------------|-------------------------------------------------------------------------------------------------------------------------------------------|--------------------------------------------------------------------|------|
| Down               | <i>FOXD3</i>                            | Upregulation diminishes cell stemness, invasion, migration, and viability and enhances apoptosis                                          | - Tissue (n=52)<br>- Cell lines C666-1 and HK-1<br>- Animal tissue | [26] |
| Down               | <i>HOXC6</i> , TGF- $\beta$ 1/mTOR axis | Associated with increased apoptosis and autophagy, reduced proliferation and invasion, clinicopathological features, and a good prognosis | - Tissue (n=126)<br>- Cell lines 5-8F, HNE-1, and HNE-2            | [20] |
| Down               | <i>SMAD7</i>                            | Correlated to clinicopathological features, radioresistance, increased apoptosis, decreased cell growth, and a good prognosis             | - Tissue (n=80)<br>- Cell lines CNE-2 and HEK-293T                 | [18] |
| Down               | WNT2B/ $\beta$ -catenin pathway         | Decreased radioresistance                                                                                                                 | - Tissue (n=15)<br>- Cell lines CNE-2, HNE-1, 5-8F, and 6-10B      | [16] |
| Down               | <i>WNT2B</i>                            | Decreased invasion and metastasis                                                                                                         | - Cell lines CNE-1, CNE-2, HNE-1, and HNE-2, 5-8F                  | [17] |

**Supplementary Table S3.** miR-185 expression in esophageal cancers.

| miR-185 expression | Affected gene / pathway | Functional consequences                                                                   | Samples analyzed                                                                                | Ref. |
|--------------------|-------------------------|-------------------------------------------------------------------------------------------|-------------------------------------------------------------------------------------------------|------|
| Down               | <i>KLK5</i>             | Upregulation reduces malignant behavior of cells and leads to better prognosis            | - Tissue (n=57)<br>- Cell lines KYSE-30, TE-1, Eca-109, EC9706, and KYSE-150<br>- Animal tissue | [36] |
| Down               | <i>RAGE/HSP27</i>       | Suppression of proliferation, migration, and invasion                                     | - Tissue (n=29)<br>- Plasma (n=28)<br>- Cell lines Eca-109, TE-11<br>- Animal tissue            | [37] |
| Down               | <i>SIX1</i>             | Inhibition of proliferation, migration, and invasion                                      | - Tissue (n= 23)<br>- Cell lines KYSE150 and KYSE30                                             | [38] |
| Up                 | <i>KLF3</i>             | Increased invasion, proliferation, migration, and tumor size                              | - Cell line Eca-109<br>- Animal tissue                                                          | [44] |
| Up                 | -                       | Upregulation is a potential diagnostic biomarker and is associated with a good prognosis. | - Tissue (n= 38)                                                                                | [33] |

**Supplementary Table S4.** miR-185 expression in gastric cancers.

| miR-185 expression | Affected gene / pathway              | Functional consequences                                                                                                     | Samples analyzed                                                                                                                                                              | Ref. |
|--------------------|--------------------------------------|-----------------------------------------------------------------------------------------------------------------------------|-------------------------------------------------------------------------------------------------------------------------------------------------------------------------------|------|
| Down               | <i>ARC</i>                           | Contributor to chemosensitivity                                                                                             | <ul style="list-style-type: none"> <li>- Tissue (n=25)</li> <li>- Cell lines NCI-N87, MGC-803, BGC-823, and AGS</li> <li>- Animal tissue</li> </ul>                           | [54] |
| Down               | <i>BCL-2, CASP-3, CASP-8, XIAP</i>   | Associated with clinicopathological features and enhanced apoptosis                                                         | <ul style="list-style-type: none"> <li>- Tissue (n=30)</li> <li>- Cell lines MKN74, SGC7901, BGC823, and MGC803</li> </ul>                                                    | [58] |
| Down               | <i>BCL-2, MDR1/P-gp, MRP-1</i>       | Involvement in chemoresistance                                                                                              | <ul style="list-style-type: none"> <li>- Tissue (n=70)</li> <li>- Cell lines SGC7901, GES-1, and SGC7901/ADR</li> </ul>                                                       | [55] |
| Down               | <i>CCND2</i>                         | Decreased apatinib-resistance                                                                                               | <ul style="list-style-type: none"> <li>- Tissue (n=80)</li> <li>- Cell line MGC-803/AP</li> </ul>                                                                             | [68] |
| Down               | <i>CTSD</i>                          | Overexpression leads to inhibition of EMT and migration and augmentation of apoptosis and cell cycle arrest                 | <ul style="list-style-type: none"> <li>- Tissue (n=10)</li> <li>- Cell lines MKN-1, AGS, SGC7901, NCI-N87, BGC823</li> </ul>                                                  | [60] |
| Down               | <i>DNMT1</i>                         | Correlation with metastasis and poor prognosis                                                                              | <ul style="list-style-type: none"> <li>- Tissue (n=162)</li> <li>- Cell lines MGC-803, BGC-823, MKN-28, SGC-7901, HGC-27, AGS, and MKN-45</li> <li>- Animal tissue</li> </ul> | [57] |
| Down               | <i>DNMT1, EZH2</i>                   | Associated with methylation status                                                                                          | <ul style="list-style-type: none"> <li>- Tissue (n=24)</li> </ul>                                                                                                             | [48] |
| Down               | <i>DNMT1, EZH2</i>                   | Inhibition of proliferation and arrest of cell cycle                                                                        | <ul style="list-style-type: none"> <li>- Tissue (n=80)</li> <li>- Cell lines AGS, MKN1, and MKN28</li> </ul>                                                                  | [49] |
| Down               | <i>DNMT1, EZH2</i>                   | Upregulation mediates NH <sub>2</sub> -terminal hydrophobic region and BRICHOS domain of the GKN1 tumor suppressive effects | <ul style="list-style-type: none"> <li>- Cell line AGS</li> </ul>                                                                                                             | [50] |
| Down               | <i>MDR1/P-gp, MRP-1, GST-π</i>       | Inhibition improves resistance to chemotherapeutic drugs                                                                    | <ul style="list-style-type: none"> <li>- Tissue (n=25)</li> <li>- Cell lines SGC7901 and SGC7901/ADR</li> </ul>                                                               | [53] |
| Down               | <i>RHOA</i>                          | Decreased migration and invasion                                                                                            | <ul style="list-style-type: none"> <li>- Tissue (n=35)</li> <li>- Cell lines AGS and MKN1</li> </ul>                                                                          | [51] |
| Down               | <i>TGF-β1</i>                        | Decreased cell growth, migration, and invasion                                                                              | <ul style="list-style-type: none"> <li>- Cell lines MGC803, BGC823, SGC-7901, AGS, KATOIII, and HEK-293T</li> </ul>                                                           | [67] |
| Down               | <i>TRIM29, Wnt/β-catenin pathway</i> | Induction of apoptosis, reduction of cell proliferation, arrest of cell cycle                                               | <ul style="list-style-type: none"> <li>- Cell lines MGC803 and BGC823</li> </ul>                                                                                              | [59] |
| Down               | -                                    | Prediction of effectiveness of chemotherapy                                                                                 | <ul style="list-style-type: none"> <li>- Tissue (n=120)</li> </ul>                                                                                                            | [56] |

|    |                                                               |                                                                |                                                                                                                          |      |
|----|---------------------------------------------------------------|----------------------------------------------------------------|--------------------------------------------------------------------------------------------------------------------------|------|
| Up | Putative targets:<br><i>AQP5, ESRRA, RAC3, RGS14, ZNFN1A4</i> | Involved in development and progression                        | - Tissue (n=10)                                                                                                          | [61] |
| Up | -                                                             | Expression associated with EBV-infected and uninfected cancers | - Tissue (n=100)                                                                                                         | [62] |
| Up | -                                                             | Diagnosis                                                      | - Tissue (n=216)<br>- Serum (n=370)<br>- Pooled serum (n=4)<br>- Exosomes in serum (n=58)                                | [65] |
| Up | -                                                             | Diagnosis                                                      | - Tissue (n=60)<br>- Plasma (n=192)<br>- Pooled plasma (n=4)<br>- Arterial plasma (n=38)<br>- Exosomes in plasma (n=20), | [64] |

**Supplementary Table S5.** miR-185 expression in hepatocellular carcinoma (HCC).

| miR-185 expression | Affected gene / pathway                 | Functional consequences                                                                                                     | Samples analyzed                                                                | Ref. |
|--------------------|-----------------------------------------|-----------------------------------------------------------------------------------------------------------------------------|---------------------------------------------------------------------------------|------|
| Down               | <i>AKT</i>                              | Decreased proliferation, invasion, and migration and increased apoptosis                                                    | - Cell lines HepG2, Huh-7, SMMC-7721, Bel-7402, and Hep3B                       | [84] |
| Down               | Akt1 signaling pathway                  | Induction of autophagy and apoptosis and inhibition of cell cycle                                                           | - Cell line HepG2                                                               | [77] |
| Down               | <i>AQP11, KIF14, KNL1, MKI67, SPC25</i> | Arrested cell cycle and increased necroptosis                                                                               | - Cell lines HepG2, Huh-7, Hep3B, HLE, HLF, HeLa, and HEK293                    | [85] |
| Down               | <i>CDC42</i>                            | High expression associated with good prognosis as well as suppressed migration and invasion through downregulation of CDC42 | - Tissue (n=63)<br>- Cell line Huh-7                                            | [71] |
| Down               | <i>CDH1, SIX2, VIM</i>                  | Suppressed cell growth, metastasis, and EMT progression                                                                     | - Cell lines HepG2, Huh-7, SNU-387, and SNU-449                                 | [74] |
| Down               | <i>DNMT1</i>                            | Overexpression decreases the expression of DNMT1                                                                            | - Cell lines Huh-7 and TFK-1                                                    | [76] |
| Down               | <i>DNMT1, DNMT3A, DNMT3B, MEG3</i>      | Increased expression of tumor suppressive gene MEG3                                                                         | - Cell lines HepG2 and Huh-7                                                    | [87] |
| Down               | DNMT1/PTEN/Akt pathway                  | Decreased cell proliferation and invasion                                                                                   | - Tissue (n=40)<br>- Cell lines HepG2, Huh7, and Hep3B cells<br>- Animal tissue | [75] |
| Down               | <i>ELK1</i>                             | Decreased HBV proteins through suppression of ELK1                                                                          | - Cell lines Huh-7 and HepG2.2.15                                               | [89] |
| Down               | ITGB5/ $\beta$ -catenin pathway         | Low expression correlated to tumorigenesis through activation of ITGB5/ $\beta$ -catenin pathway                            | - Tissue (n=61)<br>- Cell lines Huh-7 and MHCC-97L<br>- Animal tissue           | [73] |
| Down               | <i>ROCK2</i>                            | Reduced invasion and migration                                                                                              | - Tissue (n=44)<br>- Cell lines Hep-3B and SNU-387                              | [72] |
| Down               | -                                       | Reduced miR function following RACK1-knockdown                                                                              | - Tissue (n=3)<br>- Cell lines Huh-7, PLC/PRF/5, and 293T                       | [88] |
| Down               | -                                       | Potential serum biomarker for HCV-related HCC                                                                               | - Serum (n=40)                                                                  | [80] |
| Down               | -                                       | Associated with survival, recurrence, cell growth, and invasion                                                             | - Tissue (n=95)                                                                 | [78] |
| Up                 | PLAC8/Wnt/ $\beta$ -catenin pathway     | Increased HCC progression                                                                                                   | - Tissue (n=30)<br>- Cell lines Huh-7, Hep3B, and HepG2<br>- Animal tissue      | [83] |
| Up                 | -                                       | Discrimination of HBV-positive HCC patients from HBV-positive cancer-free controls                                          | - Plasma (n=67)                                                                 | [81] |
| Up                 | -                                       | Associated with venous metastasis                                                                                           | - Tissue (n=482)                                                                | [82] |

**Supplementary Table S6.** miR-185 expression in pancreatic cancer (PDAC).

| miR-185 expression | Affected gene / pathway | Functional consequences                                               | Samples analyzed                                                                                      | Ref. |
|--------------------|-------------------------|-----------------------------------------------------------------------|-------------------------------------------------------------------------------------------------------|------|
| Down               | <i>CBX2</i>             | Overexpression inhibits proliferation, migration and invasion         | - Tissue (n=67)<br>- Cell lines Capan-2, AsPC-1, PANC1, BxPC-3, and HPDE                              | [91] |
| Down               | <i>CCND2</i>            | Decreased cell proliferation, arrested cell cycle, promoted apoptosis | - Tissue (n=70)<br>- Cell lines PANC-1, ASPC-1, HPAC, and BxPC-3                                      | [90] |
| Down               | <i>TAFAZZIN</i>         | Decreased TAZ expression and cell proliferation                       | - Tissue (n=46)<br>- Cell lines HPAC, PANC-1, and 293T<br>- Serum (n=46)<br>- Pancreatic fluid (n=46) | [93] |
| Up                 | <i>CORO2B, NTRK3</i>    |                                                                       | - Tissue (n=32; database records)                                                                     | [94] |
| Up                 | -                       | Potential diagnostic and prognostic biomarker                         | - Serum (n=197)                                                                                       | [95] |

**Supplementary Table S7.** miR-185 expression in colorectal cancer (CRC).

| miR-185 expression | Affected gene / pathway               | Functional consequences                                                                       | Samples analyzed                                                                                 | Ref.  |
|--------------------|---------------------------------------|-----------------------------------------------------------------------------------------------|--------------------------------------------------------------------------------------------------|-------|
| Down               | <i>AQP5</i>                           | Increased chemosensitivity                                                                    | - Tissue (n=120)<br>- Cell lines HCT-116 and HCT-8                                               | [103] |
| Down               | <i>CDC42</i>                          | High expression reduces proliferation, migration, and invasion                                | - Tissue (n=25)<br>- Cell lines SW620, HCT-116, HT-29, and LOVO                                  | [126] |
| Down               | <i>CDC42, RHOA</i>                    | Decreased proliferation and invasion and increased cell cycle arrest and apoptosis            | - Cell lines SW1116 and LOVO                                                                     | [101] |
| Down               | <i>CDK4, CDK6</i>                     | Decrease of proliferation and increase of apoptosis                                           | - Tissue (n=25)<br>- Cell lines HCT-116, HCT-8, HT-29, DLD-1, SW620, and FHC<br>- Animal tissue  | [127] |
| Down               | <i>c-MYC</i>                          | Low expression associated with enhanced c-Myc and cell proliferation                          | - Cell line HCT-116                                                                              | [102] |
| Down               | <i>DC-SIGN</i>                        | Decreased metastasis                                                                          | - Tissue (n=56)<br>- Cell lines LS174T, HCT116, LOVO, SW620, SW480, and HT29<br>- Animal tissue  | [107] |
| Down               | <i>FSCN1</i>                          | Suppression of FSCN1 and inhibition of tumor progression                                      | - Tissue (n=94)<br>- Cell lines HCT116, SW480, HT29, NCM460, SW620, and CaCO2<br>- Animal tissue | [124] |
| Down               | <i>HIF-2<math>\alpha</math></i>       | Reduced proliferation and invasion                                                            | - Tissue (n=30)<br>- Cell lines LS174T, HCT116, LOVO, SW620, SW480, and HT29<br>- Animal tissue  | [134] |
| Down               | <i>HMGA2</i>                          | Reduced proliferation, migration, invasion and cell cycle progression and increased apoptosis | - Tissue (n=50)<br>- Cell lines LoVo, SW620, SW480, and HT29                                     | [129] |
| Down               | <i>IGF1R, IGF2</i>                    | Enhancement of radiosensitivity                                                               | - Cell line RR-HCT116                                                                            | [105] |
| Down               | <i>IGF2</i>                           | Decreased invasion and migration via IGF2 suppression                                         | - Tissue (n=10)<br>- Cell lines SW620 HT-29, HCT 116, LOVO, and SW480                            | [125] |
| Down               | <i>MAPK14, MAPKAPK2/HSP27 pathway</i> | Overexpression of miR-185 targets MAPK14 and inactivates MAPKAPK2/HSP27 pathway               | - Cell lines SW480, SW620, and HT-29<br>- Animal tissue                                          | [122] |
| Down               | <i>NRP1</i>                           | Decreased metastasis                                                                          | - Tissue (n=284)                                                                                 | [109] |

|      |                                 |                                                                                   |                                                                                                                                                             |       |
|------|---------------------------------|-----------------------------------------------------------------------------------|-------------------------------------------------------------------------------------------------------------------------------------------------------------|-------|
|      |                                 |                                                                                   | <ul style="list-style-type: none"> <li>- Cell lines Caco2, HCT116, HT29, LoVo, RKO, SW1116, SW480, NCM460, and HEK 293T</li> <li>- Animal tissue</li> </ul> |       |
| Down | <i>NOTCH3</i>                   | Decreased proliferation and metastasis                                            | <ul style="list-style-type: none"> <li>- Cell lines DLD-1, SW480, SW48, HEK-293T, and HCT-116</li> </ul>                                                    | [123] |
| Down | <i>STIM1</i>                    | Decreased migration and invasion and reversed EMT                                 | <ul style="list-style-type: none"> <li>- Tissue (n=40)</li> <li>- Cell lines SW480, SW620, HT29, and LOVO</li> <li>- Animal tissue</li> </ul>               | [104] |
| Down | <i>TEAD1</i>                    | Mitigated proliferation, migration, and invasion                                  | <ul style="list-style-type: none"> <li>- Cell lines</li> </ul>                                                                                              | [130] |
| Down | WISP2/ $\beta$ -catenin pathway | Inhibition of proliferation and induction of autophagy                            | <ul style="list-style-type: none"> <li>- Cell lines SW620 and HT29</li> <li>- Animal tissue</li> </ul>                                                      | [100] |
| Down | Wnt1/ $\beta$ -catenin pathway  | Upregulation of miR-185 targets Wnt1 and restrains Wnt1/ $\beta$ -catenin pathway | <ul style="list-style-type: none"> <li>- Tissue (n=41)</li> <li>- Cell lines HCT-116, LS174T, and SW480</li> </ul>                                          | [98]  |
| Down | Wnt/ $\beta$ -catenin pathway   | Decreased tumorigenesis                                                           | <ul style="list-style-type: none"> <li>- Cell lines LOVO and SW480</li> </ul>                                                                               | [99]  |
| Down | <i>YY1</i>                      | Inhibition of metastasis and stemness                                             | <ul style="list-style-type: none"> <li>- Tissue (n=30)</li> <li>- Cell lines SW480, HCT116, SW620 and HT-29), animal</li> </ul>                             | [128] |
| Down | -                               | Expression correlated with advanced clinical stage and metastasis                 | <ul style="list-style-type: none"> <li>- Tissue (n=52)</li> </ul>                                                                                           | [111] |
| Down | -                               | Decreased in patients with recurrence of liver metastasis                         | <ul style="list-style-type: none"> <li>- Serum (n=20)</li> </ul>                                                                                            | [114] |
| Down | -                               | Expression has prognostic value                                                   | <ul style="list-style-type: none"> <li>- Tissue (n=85)</li> </ul>                                                                                           | [113] |
| Up   | <i>ARID1A</i>                   | Downregulation of <i>ARID1A</i>                                                   | <ul style="list-style-type: none"> <li>- Tissue (n=258)</li> <li>- Cell lines HCT116 and LoVo</li> </ul>                                                    | [119] |
| Up   | -                               | Expression related to carcinogenesis in colon CSCs                                | <ul style="list-style-type: none"> <li>- Cell line HT-29</li> </ul>                                                                                         | [120] |
| Up   | -                               | Overexpression related to poor survival and metastasis                            | <ul style="list-style-type: none"> <li>- Tissue (n=50)</li> </ul>                                                                                           | [118] |
| Up   | -                               | Upregulation during MNNG induced carcinogenesis                                   | <ul style="list-style-type: none"> <li>- Cell line IEC-6</li> </ul>                                                                                         | [121] |
